# Supplementary material for: Ultrathin, flexible, and high-strength polypyrrole/Ti3C2Tx film for wide-band gigahertz and terahertz electromagnetic interference shielding
Source: Royal Society of Chemistry journal article supplement (doi:10.1039/d2ta06805b), 2022-01-01
Supplement: d2ta06805b1.pdf [file d2ta06805b1.pdf]

## **Supporting Information**

# Ultra-thin, Flexible and High-strength Polypyrrole/Ti<sub>3</sub>C<sub>2</sub>T<sub>x</sub> Film for Wide-band Gigahertz and Terahertz Electromagnetic Interference Shielding

Shaodian Yang<sup>1</sup>, Rongliang Yang<sup>1</sup>, Zhiqiang Lin<sup>2</sup>, Ximiao Wang<sup>1</sup>, Shaojing Liu<sup>1</sup>, Weibo Huang<sup>1</sup>, Zibo Chen<sup>1</sup>, Jianhong Wei<sup>2</sup>, Zhiping Zeng<sup>3</sup>, Huanjun Chen<sup>1</sup>, Yougen Hu<sup>2</sup>, and Xuchun Gui<sup>\*1</sup>

*<sup>1</sup>State Key Laboratory of Optoelectronic Materials and Technologies, School of Electronics and Information Technology, Sun Yat-sen University, Guangzhou, 510275, China*

*<sup>2</sup>Guangdong Provincial Key Laboratory of Materials for High Density Electronic Packing, Shenzhen Institutes of Advanced Technology, Chinese Academy of Sciences, Shenzhen, Guangdong, 518055 P. R. China*

*<sup>3</sup>School of Materials Science and Engineering, Sun Yat-sen University, Guangzhou, 510275, China*

\*To whom correspondence. E-mail: [guixch@mail.sysu.edu.cn](mailto:guixch@mail.sysu.edu.cn)

The EMI shielding property was obtained using an Agilent N5232 vector network analyzer based on the waveguide method in 8.2-12.4 GHz (X-Band), 12.5-18 GHz (Ku-Band), 18-26.3 GHz (K-Band) and 26.4-40 GHz (Ka-Band) with sample sizes of 22.58×10.16, 15.79×7.89, 10.67×4.32, 7.12×3.55 mm<sup>2</sup>, respectively.

The total EMI SE ( $SE_T$ ) values were the sum of the multiple internal reflections of microwaves ( $SE_M$ ), the absorption of electromagnetic energy ( $SE_A$ ), and the reflection ( $SE_R$ ). Reflectivity ( $R$ ), absorptivity ( $A$ ), and transmissivity ( $T$ ) were determined based on the measured parameters ( $S_{11}$  and  $S_{12}$ ):

$$EMI SE_T = SE_R + SE_A + SE_M \quad (1)$$

$$R = |S_{11}^2| = |S_{22}^2| \quad (2)$$

$$T = |S_{12}^2| = |S_{21}^2| \quad (3)$$

$$A = 1 - R - T \quad (4)$$

$$SE_T = -10 \log T = -20 \log S_{12} \quad (5)$$

$$SE_R = -10 \log_{10}(1 - R) \quad (6)$$

The terahertz EMI shielding property was obtained using a fiber-coupled terahertz time domain spectroscopy (THz-TDS) system in 0.2-1.6 THz with sample sizes of 10×10 mm<sup>2</sup> by a THz-TDS in transmission mode. The terahertz EMI SE ( $SE_T$ ) and transmissivity ( $T$ ) were determined based on the measured  $E$  parameters ( $E_s$  and  $E_i$ ):

$$SE_T = -10 \log T = -20 \log \frac{E_s}{E_i} \quad (7)$$

Where  $E_s$  and  $E_i$  are the amplitudes (intensities) of transmission signals for the samples and the air cavity, respectively.

## Supplementary Tables and Figures

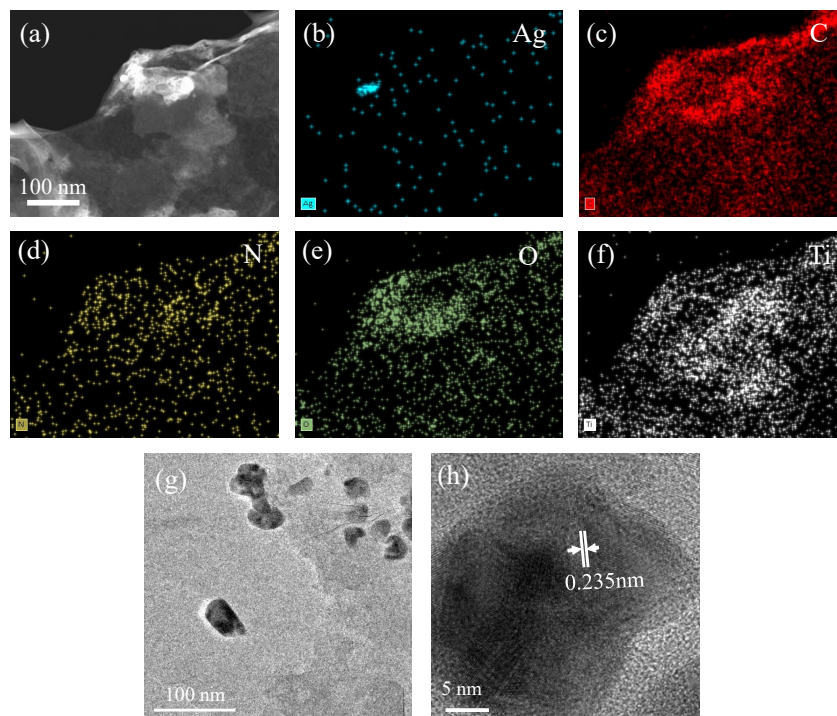

Figure S1. (a) TEM image of PPy/Ti<sub>3</sub>C<sub>2</sub>T<sub>x</sub> nanosheet. (b-f) Corresponding EDS mapping results. TEM (g-h) image of the nano Ag particles on the nanosheets.

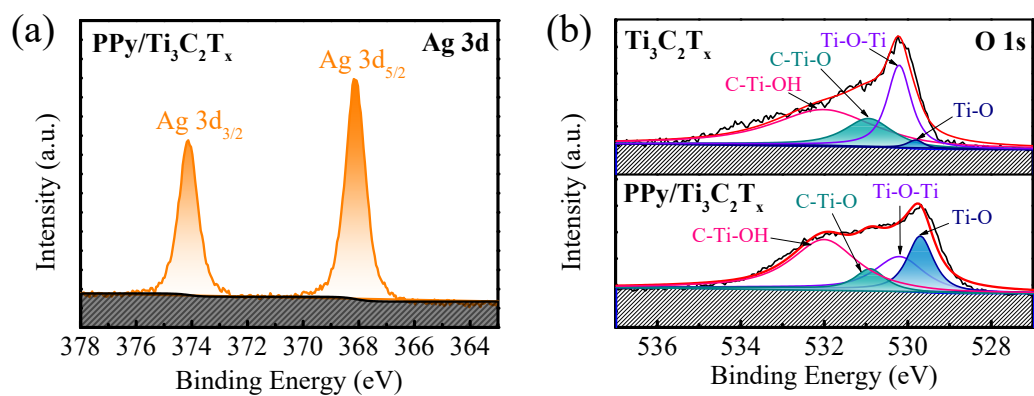

Figure S2. High-resolution XPS spectra of (a) Ag 3d and (b) O 1s for pristine Ti<sub>3</sub>C<sub>2</sub>T<sub>x</sub> film and PPy/Ti<sub>3</sub>C<sub>2</sub>T<sub>x</sub> film.

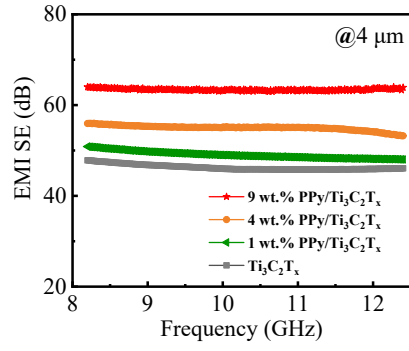

Figure S3. Total EMI SE of PPy/Ti<sub>3</sub>C<sub>2</sub>T<sub>x</sub> films with different PPy content in the frequency range of 8.2–12.4 GHz.

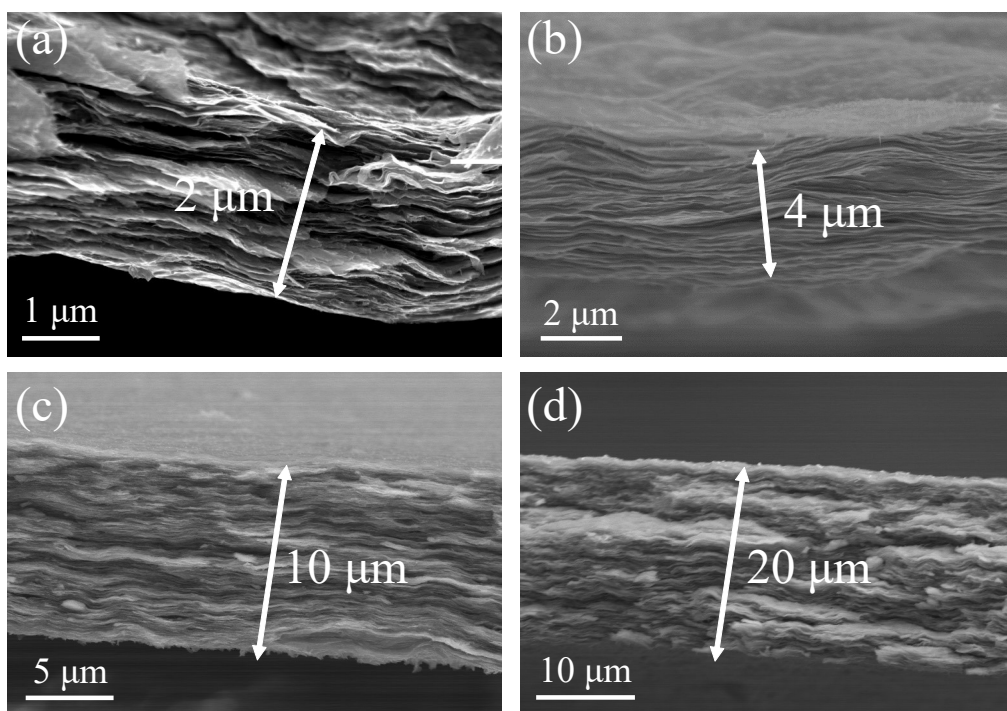

Figure S4. Cross-sectional SEM images of PPy/Ti<sub>3</sub>C<sub>2</sub>T<sub>x</sub> films (with 9 wt.% PPy) in different thickness.

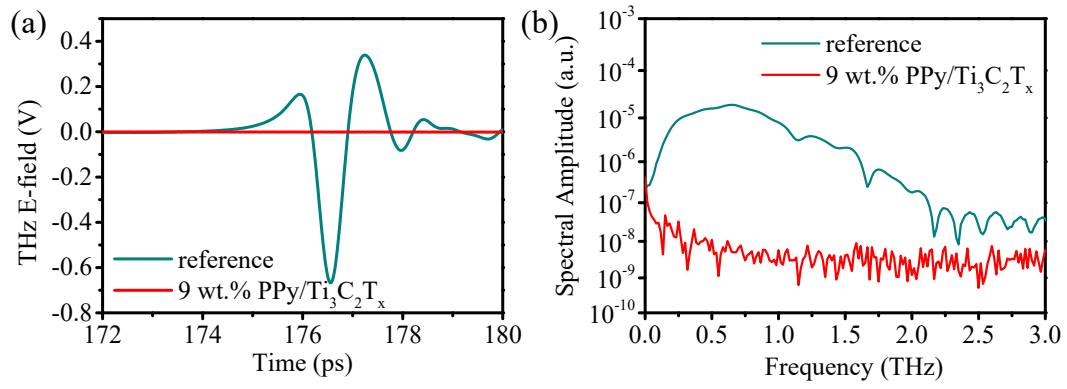

Figure S5. (a) Time-domain spectra and (b) measured transmitted THz signals of PPy/Ti<sub>3</sub>C<sub>2</sub>T<sub>x</sub> film and reference (air).

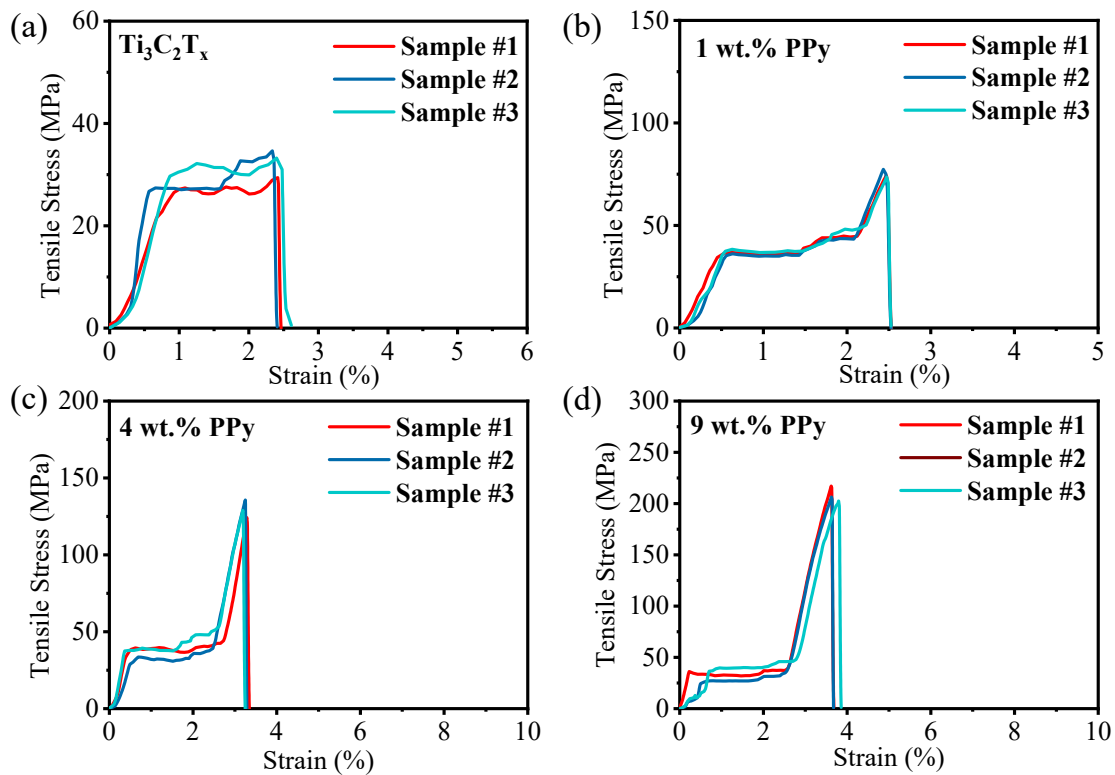

Figure S6. Tensile stress–strain curves of (a) pristine  $Ti_3C_2T_x$  film and (b-d) PPy/ $Ti_3C_2T_x$  films with different PPy content.



Table S1 Thickness, EMI shielding performance, thickness averaged specific EMI SE and frequency range of various shielding materials

| Sample                                                          | Thickness<br>( $\mu\text{m}$ ) | EMI<br>(dB) | SSE/t (dB<br>$\text{cm}^2 \text{g}^{-1}$ ) | SE/t (dB<br>$\mu\text{m}^{-1}$ ) | Frequency<br>range (Hz) | Ref.      |
|-----------------------------------------------------------------|--------------------------------|-------------|--------------------------------------------|----------------------------------|-------------------------|-----------|
| PVDF-Ti <sub>3</sub> C <sub>2</sub> T <sub>x</sub>              | 1000                           | 48          | -                                          | 0.05                             | 8.2-12.4 G              | 1         |
| PEDOT:PSS -Ti <sub>3</sub> C <sub>2</sub> T <sub>x</sub>        | 11.1                           | 42.1        | 19728                                      | 3.79                             | 8.2-12.4 G              | 2         |
| CNFs-Ti <sub>3</sub> C <sub>2</sub> T <sub>x</sub>              | 35                             | 39.6        | 7029                                       | 1.13                             | 8.2-12.4 G              | 3         |
| Ti <sub>3</sub> C <sub>2</sub> T <sub>x</sub> -PS               | 2000                           | 62          | -                                          | 0.03                             | 8.2-12.4 G              | 4         |
| PANI-Ti <sub>3</sub> C <sub>2</sub> T <sub>x</sub>              | 40                             | 36          | -                                          | 0.9                              | 8.2-12.4 G              | 5         |
| PVA-Ti <sub>3</sub> C <sub>2</sub> T <sub>x</sub>               | 27                             | 44.4        | 9343                                       | 1.65                             | 8.2-12.4 G              | 6         |
| Ti <sub>3</sub> C <sub>2</sub> T <sub>x</sub> foam              | 18                             | 50          | 69444                                      | 2.78                             | 8.2-12.4 G              | 7         |
| Ti <sub>3</sub> C <sub>2</sub> T <sub>x</sub> -SA               | 8                              | 57          | 30830                                      | 7.13                             | 8.2-12.4 G              | 8         |
| Ti <sub>3</sub> C <sub>2</sub> T <sub>x</sub>                   | 11                             | 68          | 25863                                      | 6.18                             | 8.2-12.4 G              | 8         |
| Aluminum                                                        | 8                              | 66          | 30555                                      | 8.25                             | 8.2-12.4 G              | 8         |
| Copper                                                          | 10                             | 70          | 7803                                       | 7                                | 8.2-12.4 G              | 8         |
| MGF                                                             | 3000                           | 61          | 366666                                     | 0.02                             | 0.2-1.6 T               | 9         |
| GFS                                                             | 3000                           | 74          | 70000                                      | 0.03                             | 0.2-1.6 T               | 9         |
| Ti <sub>3</sub> C <sub>2</sub> T <sub>x</sub> -PAA-ACC          | 130                            | 45          | -                                          | 0.34                             | 0.2-2.0 T               | 10        |
| rGO                                                             | 375                            | 65          | -                                          | 0.17                             | 0.1-1.0 T               | 11        |
| MSF                                                             | 10000                          | 45          | 1956                                       | 0.005                            | 0.3-1.6 T               | 12        |
| SWCNT                                                           | 200                            | 15          | -                                          | 0.08                             | 0.2-2.5 T               | 13        |
| PAL-Ti <sub>3</sub> C <sub>2</sub> T <sub>x</sub>               | 38.3                           | 50.5        | -                                          | 1.32                             | 0.2-1.6 T               | 13        |
| NMP-Ti <sub>3</sub> C <sub>2</sub> T <sub>x</sub>               | 12                             | 17          | -                                          | 1.41                             | 0.2-1.6 T               | 14        |
|                                                                 | 25                             | 65          | -                                          | 2.6                              | 0.2-1.6 T               | 14        |
| Zn <sup>2+</sup> -Ti <sub>3</sub> C <sub>2</sub> T <sub>x</sub> | 85                             | 51          | 451                                        | 0.6                              | 0.2-2.0 T               | 15        |
| 9 wt.% PPy/Ti <sub>3</sub> C <sub>2</sub> T <sub>x</sub>        | 4                              | 64.5        | 33246                                      | 16.1                             | 8.2-40.0 G              | This work |
|                                                                 | 4                              | 71.4        | 36983                                      | 17.8                             | 0.2-1.6 T               | This work |

Table S2 Tensile stress, strain and various  $Ti_3C_2T_x$  shielding materials

| Sample                      | Tensile stress (MPa) | Strain (%) | Toughness ( $MJ m^{-3}$ ) | Ref.      |
|-----------------------------|----------------------|------------|---------------------------|-----------|
| $Ti_3C_2T_x$ -PVDF-Ni       | 41.9                 | 9          | 2.9                       | 16        |
| d- $Ti_3C_2T_x$ -CNF        | 135.4                | 16.7       | 14.8                      | 17        |
| $Ti_3C_2T_x$ -PVA           | 91                   | 4.0        | -                         | 18        |
| $Ti_3C_2T_x$ -NC-Agnws      | 63.80                | 1.52       | -                         | 19        |
| $Ti_3C_2T_x$ -Go fiber      | 132.5                | 2.9        | 2.69                      | 20        |
| $Ti_3C_2T_x$ -Kevlar        | 162                  | 5.4        | 3.8                       | 21        |
| 9 wt.% PPy/<br>$Ti_3C_2T_x$ | 200                  | 3.8        | 2.3                       | This work |

Table S3 EMI SE, Thickness, Frequency range, SSE/t and Tensile stress of various ultrathin EMI shielding films

| Sample                                           | EMI (dB)     | Thickness ( $\mu\text{m}$ ) | Frequency range (Hz)    | SSE/t ( $\text{dB cm}^2 \text{g}^{-1}$ ) | Tensile stress (MPa) | Ref.         |
|--------------------------------------------------|--------------|-----------------------------|-------------------------|------------------------------------------|----------------------|--------------|
| Graphene                                         | 48.3         | 43                          | 8.2-12.4 G              | 6240                                     | 40.9                 | 22           |
| $\text{Ti}_3\text{C}_2\text{T}_x$                | 42.5         | 7.2                         | 8.2-12.4 G              | 22529                                    | 5.62                 | 2            |
| $\text{Ti}_3\text{C}_2\text{T}_x/\text{CNFs}$    | 25           | 47                          | 8.2-12.4 G              | 2647                                     | 44.2                 | 17           |
| $\text{Ti}_3\text{C}_2\text{T}_x/\text{polymer}$ | 42.1         | 11.1                        | 8.2-12.4 G              | 19728                                    | 13.71                | 2            |
| Cu foil                                          | 70           | 10                          | 8.2-12.4 G              | 7803                                     | 250                  | 8            |
| 9 wt.%<br>PPy/ $\text{Ti}_3\text{C}_2\text{T}_x$ | 64.5<br>71.4 | 4<br>4                      | 8.2-40.0 G<br>0.2-1.6 T | 33246<br>36983                           | 200                  | This<br>work |

## Supplementary References

- 1 K. Rajavel, S. Luo, Y. Wan, X. Yu, Y. Hu, P. Zhu, R. Sun and C. Wong, *Compos. Part A Appl. Sci. Manuf.*, 2020, **129**, 105693.
- 2 R. Liu, M. Miao, Y. Li, J. Zhang, S. Cao and X. Feng, *ACS Appl. Mater. Interfaces*, 2018, **10**, 44787–44795.
- 3 B. Zhou, Z. Zhang, Y. Li, G. Han, Y. Feng, B. Wang, D. Zhang, J. Ma and C. Liu, *ACS Appl. Mater. Interfaces*, 2020, **12**, 4895–4905.
- 4 R. Sun, H. Bin Zhang, J. Liu, X. Xie, R. Yang, Y. Li, S. Hong and Z. Z. Yu, *Adv. Funct. Mater.*, 2017, **27**, 1702807.
- 5 Y. Zhang, L. Wang, J. Zhang, P. Song, Z. Xiao, C. Liang, H. Qiu, J. Kong and J. Gu, *Compos. Sci. Technol.*, 2019, **183**, 107833.
- 6 X. Jin, J. Wang, L. Dai, X. Liu, L. Li, Y. Yang, Y. Cao, W. Wang, H. Wu and S. Guo, *Chem. Eng. J.*, 2020, **380**, 122475.
- 7 J. Liu, H. Bin Zhang, R. Sun, Y. Liu, Z. Liu, A. Zhou and Z. Z. Yu, *Adv. Mater.*, 2017, **29**, 1702367.
- 8 F. Shahzad, M. Alhabeab, C. B. Hatter, B. Anasori, S. M. Hong, C. M. Koo and Y. Gogotsi, *Science*, 2016, **353**, 1137–1140.
- 9 Z. Huang, H. Chen, S. Xu, L. Y. Chen, Y. Huang, Z. Ge, W. Ma, J. Liang, F. Fan, S. Chang and Y. Chen, *Adv. Opt. Mater.*, 2018, **6**, 1801165.
- 10 Y. Zhu, J. Liu, T. Guo, J. J. Wang, X. Tang and V. Nicolosi, *ACS Nano*, 2021, **15**, 1465–1474.
- 11 S. Dong, Q. Shi, W. Huang, L. Jiang and Y. Cai, *J. Mater. Sci. Mater. Electron.*, 2018, **29**, 17245–17253.
- 12 W. Shui, J. Li, H. Wang, Y. Xing, Y. Li, Q. Yang, X. Xiao, Q. Wen and H. Zhang, *Adv. Opt. Mater.*, 2020, **8**, 2001120.
- 13 J. T. Hong, D. J. Park, J. Y. Moon, S. B. Choi, J. K. Park, F. Rotermund, J.-Y. Park, S. Lee and Y. H. Ahn, *Appl. Phys. Express*, 2012, **5**, 015102.
- 14 Q. Zou, W. Guo, L. Zhang, L. Yang, Z. Zhao, F. Liu, X. Ye, Y. Zhang and W. Shi, *Nanotechnology*, 2020, **31**, 505710.

- 15 Z. Lin, J. Liu, W. Peng, Y. Zhu, Y. Zhao, K. Jiang, M. Peng and Y. Tan, *ACS Nano*, 2020, **14**, 2109–2117.
- 16 S. J. Wang, D. Sen Li and L. Jiang, *Adv. Mater. Interfaces*, 2019, **6**, 1–9.
- 17 W. T. Cao, F. F. Chen, Y. J. Zhu, Y. G. Zhang, Y. Y. Jiang, M. G. Ma and F. Chen, *ACS Nano*, 2018, **12**, 4583–4593.
- 18 Z. Ling, C. E. Ren, M. Q. Zhao, J. Yang, J. M. Giammarco, J. Qiu, M. W. Barsoum and Y. Gogotsi, *Proc. Natl. Acad. Sci. U. S. A.*, 2014, **111**, 16676–16681.
- 19 M. Miao, R. Liu, S. Thaiboonrod, L. Shi, S. Cao, J. Zhang, J. Fang and X. Feng, *J. Mater. Chem. C*, 2020, **8**, 3120–3126.
- 20 S. Seyedin, E. R. S. Yanza and J. M. Razal, *J. Mater. Chem. A*, 2017, **5**, 24076–24082.
- 21 Z. Zhang, S. Yang, P. Zhang, J. Zhang, G. Chen and X. Feng, *Nat. Commun.*, 2019, **10**, 2920.
- 22 Y. Liu, J. Zeng, D. Han, K. Wu, B. Yu, S. Chai, F. Chen and Q. Fu, *Carbon*, 2018, **133**, 435–445.
